# Supplementary material
Source: PubMed Central journal article supplement (PMC4896693)
Supplement: pnas.1524214113.sapp.pdf [file pnas.1524214113.sapp.pdf]

## Hobbs *et al.* - Supporting Information Appendix

### Supporting Information Text

#### Chemical shifts, coupling constants and assignments for the two observed products of $\Delta$ GalA digestion:

*4-deoxy-5-hydroxy- $\alpha$ -D-idopyranuronate*: 4.66 ppm (1H, d, J = 4 Hz, H-1), 4.02 ppm (1H, ddd, J = 12, 10, 5 Hz, H-3), 3.86 ppm (1H, dd, J = 10, 4 Hz, H-2), 2.49 ppm (1H, dd, J = 14, 5, H-4 equatorial), 1.88 ppm (1H, dd, J = 14, 12 Hz, H-4 axial)

*4-deoxy-5-hydroxy- $\alpha$ -D-glucopyranuronate*: 4.61 ppm (1H, d, J = 4 Hz, H-1), 3.96 ppm (1H, ddd, J = 8, 8, 5 Hz, H-3), 3.86 ppm (1H, dd, J = 7, 4 Hz, H-2), 2.40 ppm (1H, dd, J = 15, 5 Hz, H-4 equatorial), 2.00 ppm (1H, dd, J = 15, 8 Hz, H-4 axial)

Resonances for H-2, H-3, and H-4ax/eq in each product, and the assignment of ido- vs. gluco-isomeric structures, are assigned based on the expected shifts and coupling constants for these products and are confirmed by comparison to NMR spectra of structurally similar  $\beta$ -anomer isomers of 4-deoxy-5-hydroxy-idopyranuronate and 4-deoxy-5-hydroxy-glucopyranuronate (1). The assignment of both products in the current work as  $\alpha$ -anomers is based on the small coupling constants (4 Hz) between H-1 and H-2, consistent with the equatorial-axial coupling expected for  $\alpha$ -anomeric products and distinct from the larger axial-axial coupling constants seen in the previously reported  $\beta$ -anomers. See Tables S2 and S3 for complete details.

### Supporting Information Methods

#### Bacterial Strains, Plasmids and Chemicals

*Escherichia coli* ATCC 25922 (GenBank accession number ASHD00000000.1) and genomic DNA for *Yersinia enterocolitica subsp. enterocolitica* 8081 (ATCC 9610D; GenBank accession number NC\_008800) were both obtained from Cedarlane Laboratories. The plasmids pKOV-unstuff and pET15b-Alg17c were obtained from Prof Benjamin Kerr, University of Washington and Prof Satish Nair, University of Illinois, respectively. Polyuronates were purchased from Sigma-Aldrich (polygalacturonate), Santa Cruz Biotechnology (digalacturonate) and Aglyco (D-dimannuronate).

### **Isolation, Genome Sequencing and Annotation of *Halomonas* sp.**

*Halomonas* sp. was isolated from *Macrocystis* sp. growing in the intertidal zone near Victoria, British Columbia during spring 2010. A seaweed broth was prepared from 1% (w/v) dried *Fucus* sp. in artificial seawater (Sigma-Aldrich) and sterilized by autoclaving. This broth was then inoculated with fragments of freshly collected, partially decomposed *Macrocystis* sp. and incubated at 20 °C and 200 rpm until dense bacterial growth had occurred (36 hours). The culture was diluted in artificial seawater (ASW) medium and streaked on seaweed broth agar plates. Single white colonies were re-streaked twice to ensure purity. Isolated colonies were further screened for their ability to use alginate as the sole carbon source by plating on minimal marine medium (2) containing 0.25% (w/v) agarose and vitamin mix (3). Genomic DNA extractions were performed using the QIAamp DNA mini kit (Qiagen) after culture of bacteria in marine broth 2216 (Difco) at 20 °C and 200 rpm for 24 hours. Genome sequencing was performed by the Genome Sciences Centre of the British Columbia Cancer Agency. Briefly, the purity, quality and quantity of DNA was analyzed using an Agilent Bioanalyzer, and 1 µg was used for library preparation for Illumina PET sequencing. Genome assembly was performed using the default parameters of ABySS 1.3.4. An assembly was run at every 8 k value from 56 to 96 with the 96 k assembly selected as the best on the basis of an optimized N50 value. 4.37 mega base pairs of sequence were assembled in 68 contigs larger than 200 base pairs, with 50% of the genome assembled in 5 contigs larger than 246 kilo base pairs. The largest contig was 690 kilo base pairs. Open reading frames were identified and annotated using the automated RAST annotation pipeline (4). The nucleotide sequence of *kdgF* from *Halomonas* sp. is available from GenBank under accession number KU156827; the remaining genes in the *kdgF* operon are available under the accession numbers KU697803-KU697810.

### **Cloning and Mutagenesis**

The generation of the expression constructs pET28a-YeOgl and pET28a-YePL2A has been described previously (5, 6). The genes encoding for YeKdgF (locus tag YE1889) and HaKdgF were amplified from genomic DNA using the primers YeKdgF fwd/rev and HaKdgF fwd/rev (Table S5), respectively, and ligated into pET28a between the *NheI* and *XhoI* restriction sites. The genes encoding for EcKdgF (K758\_20431), YeKdul (YE1888) and YeKduD (YE1887) were amplified and cloned into pET28a using the In-Fusion HD Cloning Kit (Clontech Laboratories Inc.) and the primers EcKdgF fwd/rev, YeKdul fwd/rev and YeKduD fwd/rev (Table S5), respectively. The same kit, combined with mutagenic primers (Integrated DNA Technologies), was used to introduce mutations into pET28a-YeKdgF. All cloning and mutagenesis was confirmed by sequencing (Sequetech Corp.).

## Protein Expression and Purification

All proteins, with the exception of Alg17c, were expressed in BL21(DE3) in Luria-Bertani (LB) broth at 16 °C for 18 hours with 0.5 mM IPTG induction. Alg17c was expressed in Rosetta as previously described (7). Recombinant proteins were released from cells by chemical lysis and purified by immobilized Ni<sup>2+</sup>-affinity chromatography in binding buffer (20 mM Tris-HCl pH 8.0, 500 mM NaCl) with an imidazole gradient. All proteins were dialyzed against 20 mM Tris-HCl pH 8.0 overnight at 4 °C prior to use, with the exception of Alg17c which was dialyzed against 50 mM Tris-HCl pH 7.5, 100 mM NaCl. YeKdgF and HaKdgF were further purified prior to crystallization by size-exclusion chromatography using a HiPrep 16/60 Sephacryl S-100 HR column (GE Healthcare) equilibrated with 20 mM Tris-HCl pH 8.0. All proteins were concentrated at 4°C using an Amicon stirred ultrafiltration unit fitted with either a 5 or 10 kDa molecular weight cut-off cellulose membrane as appropriate. The purity of all proteins was assessed by SDS-PAGE.

## Enzyme Assays

The concentration-dependent activity of YekdgF and EckdgF on unsaturated galacturonate was determined in a linked assay with YeOgl. Digalacturonate at 1 mM was prepared in assay buffer (100 mM Tris-HCl pH 7.5) and incubated with 0.5 μM YeOgl at 25 °C. The production of unsaturated galacturonate was monitored at 230 nm in a SpectraMax M5 plate reader (Molecular Devices) using a UV-Star<sup>®</sup> 96-well microplate (Greiner Bio-One) as previously described (6). Once the absorbance had plateaued, YeKdgF or EckdgF were added at different concentrations and the decrease in absorbance followed (an equivalent volume of 20 mM Tris-HCl pH 8.0 was added to the 0 nM KdgF reactions). The concentration-dependent activity of HaKdgF on unsaturated mannuronate was determined in the same manner but employed Alg17c at 0.23 μM in place of YeOgl. Absorbances at 230 nm were converted to μM using an extinction coefficient of 5200 M<sup>-1</sup> cm<sup>-1</sup> (8). For substrate specificity assays, YeKdgF and HaKdgF were used at 1 μM. The activities of YeKdgF mutants at 250 nM were determined as described above and compared with wildtype YeKdgF. Wildtype YeKdgF was always tested alongside the mutants and used for relative activity calculations to account for any plate-specific variance. The rate for each enzyme was determined from the first 1-3 minutes of data and corrected for any activity observed in the absence of YeKdgF. Metal dependence assays were performed with YeKdgF that had been treated with 50 mM EDTA and then dialyzed overnight against 20 mM Tris-HCl pH 8.0 (previously treated with Chelex resin to remove metals) containing 2 mM of different metals (or no metal) (9). The initial rate of activity was determined as described for mutant enzymes. A second linked assay was established in which the oxidation of NADH was

used as a read-out of sequential digalacturonate processing by YeOgl, YeKdgF, YeKdul and YeKduD. Reactions containing 200  $\mu\text{M}$  NADH and different combinations of YeOgl, YeKdgF, YeKdul and YeKduD at 0.5  $\mu\text{M}$  each were set up in assay buffer at 25 °C and initiated with the addition of digalacturonate to 1 mM. The activity of YeKduD was followed as a decrease in absorbance at 340 nm and the absorbance values converted to  $\mu\text{M}$  of NADH oxidized using an extinction coefficient of 5200  $\text{M}^{-1} \text{cm}^{-1}$ . All enzyme assay data were processed, and statistical analyses performed, using GraphPad Prism 6.0.7.

### **Differential Scanning Fluorimetry**

Thermal unfolding curves for YeKdgF and its mutants were generated using the fluorophore SYPRO® Orange (Life Technologies) in a Bio-Rad CFX96 Touch™ real-time PCR machine as previously described (10). Proteins (1 mg/ml final) were unfolded in 50 mM Tris-HCl pH 7.5 with SYPRO® Orange at a final concentration of 10x and a ramp rate of 1 °C/minute.

### **Crystallization and Structure Determination**

YeKdgF and HaKdgF were crystallized using the hanging drop vapor diffusion method at 18 °C. Crystals of YeKdgF in the spacegroup P2<sub>1</sub>2<sub>1</sub>2<sub>1</sub> were obtained in 0.1 M CAPSO pH 9.0, 21% PEG 3350, 0.28 M MgCl<sub>2</sub>·6H<sub>2</sub>O with protein at 20 mg/ml and cryoprotected in crystallization solution supplemented with 20% ethylene glycol. Crystals of YeKdgF in the spacegroup P3<sub>2</sub>21 were obtained in 75% tacsimate pH 7.0 with protein at 25 mg/ml and cryoprotected with 75% tacsimate. Crystals of HaKdgF were obtained in 20 mM Tris-HCl pH 7.5, 1.2 M sodium citrate with protein at 20 mg/ml and cryoprotected in crystallization solution supplemented with 20% ethylene glycol. Crystals were flash-cooled in liquid nitrogen and kept at 113K for diffraction data collection. Diffraction data were collected at the University of Victoria at a wavelength of 1.54187 Å using a Rigaku R-Axis IV++ area detector coupled to a MM-002 X-ray generator with Osmic “blue” optics and an Oxford Cryostream 700, or at the Canadian Light Source on beamline 08ID-1. Diffraction data were integrated with Mosflm (11), and scaled and merged using SCALA (12, 13). The structure of YeKdgF in P212121 spacegroup was solved by molecular replacement using an RmlC-like cupin from *Shewanella frigidimarina* (PDB ID code 2PFW) as a search model and the program PHASER (14). Starting with this model, ARP/wARP (15) was used to build a nearly complete model of YeKdgF, which was finished by iterative manual building with COOT (16) and refinement with REFMAC (17). A monomer from this YeKdgF model was used as a search model to solve the structures of HaKdgF and YeKdgF in the P3<sub>2</sub>21 spacegroup. Again, model completion was achieved by iterative manual building with COOT and refinement with REFMAC. All data collection and processing statistics are shown in

Table S4. For all structures, the addition of water molecules was performed in COOT with FINDWATERS and manually checked after refinement. In all data sets, refinement procedures were monitored by flagging 5% of all observations as “free” (18). Model validation was performed with MOLPROBITY (19).

### **Preparation and Purification of 4,5-Unsaturated Digalacturonate ( $\Delta$ GalUA<sub>2</sub>)**

$\Delta$ GalUA<sub>2</sub> was prepared by digesting polygalacturonic acid (Sigma P-1879) with the endolytic pectate lyase VvPL2 (9). Digestions consisting of 1  $\mu$ M VvPL2, 50 mM CAPSO pH 9.0, 1 mM MgCl<sub>2</sub> and 1 mg/ml polygalacturonic acid were incubated at 37°C overnight, and the subsequent products separated on a Bio-Gel P2 size-exclusion column (Bio-Rad) running at 0.25 ml/min for 35 hours. Fractions containing  $\Delta$ GalUA<sub>2</sub> were identified by thin layer chromatography as previously described (9), pooled and lyophilized.

### **<sup>1</sup>H NMR on Digests of $\Delta$ GalUA<sub>2</sub>**

<sup>1</sup>H NMR spectra were recorded on a Bruker AV-500 spectrometer operating at 500.27 MHz, using an inverse-configuration 5-mm probe with a Z-gradient. Full spectra were obtained with a double pre-saturation to eliminate the water and Tris-HCl resonances at 4.8 and 3.7 ppm, respectively. The spectral width was 16 ppm, with 32K data points, and a relaxation delay of 2 s. A solution of 1 mM  $\Delta$ GalUA<sub>2</sub> in 100 mM Tris-HCl pH 7.5 was deuterated by the addition of D<sub>2</sub>O to 10% (v/v) final. Full spectra were collected of the disaccharide and at regular intervals following the addition of YeKdgF and/or YeOgl (both at 1  $\mu$ M final). When the spectra stabilized, indicating that the reactions had reached completion, 1D selective TOCSY sub-spectra were obtained. These spectra were obtained with a Gaussian shaped selective pulse of 36-50 ms centered on one of the geminal pairs at the 4 position and a 120 ms TOCSY spinlock, with the same relaxation delay and resolution as the full spectra. All spectra were run at 300 K. Spectra were referenced to the methyl resonance of sodium 3-trimethylsilylpropionate-2,2,3,3-d<sub>4</sub> (TSP) at 0 ppm by adding a small amount to one of the samples after the spectra had been obtained. This spectral reference setting was transferred to all other spectra.

### ***kdgF* Deletion and Complementation**

Marker-less deletion of *kdgF* and from the chromosome of ATCC 25922 was performed using a modified version of the vector pKOV (20) in which a stuffer region has been removed (21). Regions of approximately 850 bp immediately upstream and downstream of *EckdgF* were amplified using the primers *kdgF* upstream fwd/rev and *kdgF* downstream fwd/rev (Table S5). The two flanks were joined together and cloned into the modified pKOV vector between the *NotI* and *BamHI* sites in a single step using the In-Fusion HD Cloning Kit. This construct was then

transformed into ATCC 25922 at 30 °C, a single colony picked and grown in LB broth with 50 µg/ml chloramphenicol at 43 °C overnight to force integration and then plated on LB agar containing chloramphenicol at 43 °C. To excise the plasmid from the chromosome, 4-6 integrant colonies were used to inoculate a single LB culture containing no chloramphenicol which was grown overnight at 30 °C prior to plating on NaCl-free LB agar containing 10% sucrose. Resultant colonies were screened for chloramphenicol sensitivity by replica plating, and chloramphenicol sensitive, sucrose resistant colonies were screened by colony PCR for the presence of *kdgF*. Deletion of *kdgF*, and non-disturbance of the surrounding sequence, was confirmed by amplification with the primers *kdgF* flank fwd/rev (which are positioned outside of the originally amplified upstream and downstream regions) and sequencing of the entire region. Complementation of  $\Delta kdgF$  was achieved in two ways: firstly, the methods described above for deletion of *kdgF* were employed to reinsert *kdgF* into the chromosome (using the primers *kdgF* upstream fwd and *kdgF* downstream rev to amplify the *kdgF*-containing region for cloning), and secondly, *kdgF* was cloned into the low copy number, *tac*-driven vector pGEX-5X-2 (GE Healthcare) using the In-Fusion HD Cloning Kit and the primers pGEX-*kdgF* fwd/rev, which removed the GST fusion tag. The construct pGEX-*kdgF* was then transformed into the  $\Delta kdgF$  strain.

### **Growth Assay on Polygalacturonate**

Strains grown overnight in M9 minimal medium containing 0.4% (w/v) autoclaved PGA, trace metal mix and 0.5 µM filter-sterilized YePL2A were used to inoculate growth assay cultures in Erlenmeyer flasks. For strains carrying pGEX constructs, ampicillin (100 µg/ml final) and IPTG (0.1 mM final) were also added to the medium. Four replicates were set up for each strain (using four separate overnight cultures), at 37 °C with shaking and samples taken for OD<sub>600nm</sub> readings every 45-100 minutes. Growth rates and lag times were calculated using the program GrowthRates (22). Statistical analysis was performed in GraphPad Prism 6.0.7.

### **Supporting Information References**

1. Jongkees SA, Withers SG (2011) Glycoside cleavage by a new mechanism in unsaturated glucuronyl hydrolases. *J Am Chem Soc* 133(48):19334-19337.
2. Therkildsen M, Isaksen M, Lomstein B (1997) Urea production by the marine bacteria *Delia venusta* and *Pseudomonas stutzeri* grown in a minimal medium. *Aquat Microb Ecol* 13(2):213–217.
3. Finster K, Tanimoto Y, Bak F (1992) Fermentation of methanethiol and dimethylsulfide by

- a newly isolated methanogenic bacterium. *Arch Microbiol* 157(5):425–430.
4. Overbeek R, et al. (2014) The SEED and the Rapid Annotation of microbial genomes using Subsystems Technology (RAST). *Nucleic Acids Res* 42:D206–14.
  5. Abbott DW, Boraston AB (2007) A family 2 pectate lyase displays a rare fold and transition metal-assisted  $\beta$ -elimination. *J Biol Chem* 282(48):35328–36.
  6. Abbott DW, Gilbert HJ, Boraston AB (2010) The active site of oligogalacturonate lyase provides unique insights into cytoplasmic oligogalacturonate  $\beta$ -elimination. *J Biol Chem* 285(50):39029–38.
  7. Park D, Jagtap S, Nair SK (2014) Structure of a PL17 family alginate lyase demonstrates functional similarities among exotype depolymerases. *J Biol Chem* 289(12):8645–8655.
  8. Extinction coefficient
  9. McLean R, et al. (2015) Functional analyses of resurrected and contemporary enzymes illuminate an evolutionary path for the emergence of exolysis in polysaccharide lyase family 2. *J Biol Chem* 290(35):21231–43.
  10. Niesen FH, Berglund H, Vedadi M (2007) The use of differential scanning fluorimetry to detect ligand interactions that promote protein stability. *Nat Protoc* 2(9):2212–21.
  11. Battye TGG, Kontogiannis L, Johnson O, Powell HR, Leslie AGW (2011) iMOSFLM: a new graphical interface for diffraction-image processing with MOSFLM. *Acta Crystallogr D Biol Crystallogr* 67(Pt 4):271–81.
  12. Evans P (2006) Scaling and assessment of data quality. *Acta Crystallogr D Biol Crystallogr* 62(Pt 1):72–82.
  13. Winn MD, et al. (2011) Overview of the CCP4 suite and current developments. *Acta Crystallogr D Biol Crystallogr* 67(Pt 4):235–42.
  14. McCoy AJ, et al. (2007) Phaser crystallographic software. *J Appl Crystallogr* 40(Pt 4):658–674.
  15. Langer G, Cohen SX, Lamzin VS, Perrakis A (2008) Automated macromolecular model building for X-ray crystallography using ARP/wARP version 7. *Nat Protoc* 3(7):1171–9.
  16. Emsley P, Cowtan K (2004) Coot: model-building tools for molecular graphics. *Acta Crystallogr D Biol Crystallogr* 60(Pt 12 Pt 1):2126–32.
  17. Murshudov GN, et al. (2011) REFMAC5 for the refinement of macromolecular crystal structures. *Acta Crystallogr D Biol Crystallogr* 67(Pt 4):355–67.
  18. Brünger AT (1992) Free R value: a novel statistical quantity for assessing the accuracy of crystal structures. *Nature* 355(6359):472–475.
  19. Chen VB, et al. (2010) MolProbity: all-atom structure validation for macromolecular

- crystallography. *Acta Crystallogr D Biol Crystallogr* 66(Pt 1):12–21.
20. Link AJ, Phillips D, Church GM (1997) Methods for generating precise deletions and insertions in the genome of wild-type *Escherichia coli*: application to open reading frame characterization. *J Bacteriol* 179(20):6228–37.
  21. Lindsey HA, Gallie J, Taylor S, Kerr B (2013) Evolutionary rescue from extinction is contingent on a lower rate of environmental change. *Nature* 494(7438):463–7.
  22. Hall BG, Acar H, Nandipati A, Barlow M (2014) Growth rates made easy. *Mol Biol Evol* 31(1):232–8.
  23. Rodionov DA, Gelfand MS, Hugouvieux-Cotte-Pattat N (2004) Comparative genomics of the KdgR regulon in *Erwinia chrysanthemi* 3937 and other gamma-proteobacteria. *Microbiology* 150(11):3571–3590.
  24. Wargacki a. J, et al. (2012) An engineered microbial platform for direct biofuel production from brown macroalgae. *Science* 335(6066):308–313.
  25. Lombard V, Golaconda Ramulu H, Drula E, Coutinho PM, Henrissat B (2014) The carbohydrate-active enzymes database (CAZy) in 2013. *Nucleic Acids Res* 42:D490–5.

## Supporting Information Tables

**Table S1. Specific activities for YeKdgF and HaKdgF on  $\Delta$ GalA and  $\Delta$ ManA**

| Enzyme | Specific activity ( $\mu\text{M min}^{-1} \mu\text{g}^{-1}$ ) $\pm$ SEM |                |
|--------|-------------------------------------------------------------------------|----------------|
|        | $\Delta$ GalA                                                           | $\Delta$ ManA  |
| YeKdgF | 191.5 $\pm$ 2.5                                                         | 52.9 $\pm$ 4.9 |
| HaKdgF | 168.9 $\pm$ 8.5                                                         | 33.3 $\pm$ 3.9 |

Values shown were calculated from the slopes shown in Fig. S3 (n=3).



**Table S2. Chemical shifts, coupling constants and assignments for 4-deoxy-5-hydroxy- $\alpha$ -D-idopyranuronate**

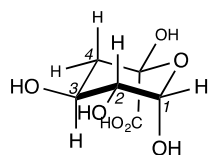

4-deoxy-5-hydroxy- $\alpha$ -D-idopyranuronate

| Proton           | Chemical shift (type)               | Coupling constants and relative geometries                                                                            |
|------------------|-------------------------------------|-----------------------------------------------------------------------------------------------------------------------|
| H-1              | 4.66 ppm (anomeric)                 | 4 Hz (coupled to H-2, equatorial-axial)                                                                               |
| H-2              | 3.86 ppm ( $\text{CH}_2\text{OH}$ ) | 4 Hz (coupled to H-1, equatorial-axial)<br>10 Hz (coupled to H-3, axial-axial)                                        |
| H-3              | 4.02 ppm ( $\text{CH}_2\text{OH}$ ) | 12 Hz (coupled to H-4, axial-axial)<br>10 Hz (coupled to H-2, axial-axial)<br>5 Hz (coupled to H-4, axial-equatorial) |
| H-4 (equatorial) | 2.49 ppm ( $\text{CH}_2$ )          | 14 Hz (H-4 — H-4, geminal)<br>5 Hz (coupled to H-3, equatorial-axial)                                                 |
| H-4 (axial)      | 1.88 ppm ( $\text{CH}_2$ )          | 14 Hz (H-4 — H-4, geminal)<br>12 Hz (coupled to H-3, axial-axial)                                                     |

**Table S3. Chemical shifts, coupling constants and assignments for 4-deoxy-5-hydroxy- $\alpha$ -D-glucopyranuronate**

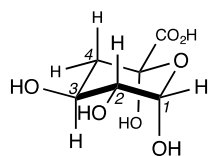

4-deoxy-5-hydroxy- $\alpha$ -D-glucopyranuronate

| Proton           | Chemical shift (type)               | Coupling constants and relative geometries                                                                          |
|------------------|-------------------------------------|---------------------------------------------------------------------------------------------------------------------|
| H-1              | 4.61 ppm (anomeric)                 | 4 Hz (coupled to H-2, equatorial-axial)                                                                             |
| H-2              | 3.86 ppm ( $\text{CH}_2\text{OH}$ ) | 4 Hz (coupled to H-1, equatorial-axial)<br>7 Hz (coupled to H-3, axial-axial)                                       |
| H-3              | 3.96 ppm ( $\text{CH}_2\text{OH}$ ) | 8 Hz (coupled to H-4, axial-axial)<br>8 Hz (coupled to H-2, axial-axial)<br>5 Hz (coupled to H-4, axial-equatorial) |
| H-4 (equatorial) | 2.40 ppm ( $\text{CH}_2$ )          | 15 Hz (H-4 — H-4, geminal)<br>5 Hz (coupled to H-3, equatorial-axial)                                               |
| H-4 (axial)      | 2.00 ppm ( $\text{CH}_2$ )          | 15 Hz (H-4 — H-4, geminal)<br>8 Hz (coupled to H-3, axial-axial)                                                    |

**Table S4. Data collection and refinement statistics**

|                                                     | <b>HaKdgF Citrate</b>               | <b>YeKdgF Malonate</b> | <b>YeKdgF</b>                                 |
|-----------------------------------------------------|-------------------------------------|------------------------|-----------------------------------------------|
| <b>Data collection</b>                              |                                     |                        |                                               |
| Wavelength (Å)                                      | 1.5418                              | 0.979490               | 0.979490                                      |
| Space group                                         | C2                                  | P3 <sub>2</sub> 21     | P2 <sub>1</sub> 2 <sub>1</sub> 2 <sub>1</sub> |
| Cell dimensions                                     |                                     |                        |                                               |
| <i>a</i> , <i>b</i> , <i>c</i> (Å)                  | 111.29, 78.22, 68.12<br>(β=113.73°) | 60.19, 60.19, 67.83    | 30.92, 73.76, 83.68                           |
| Resolution (Å)                                      | 33.2-2.0                            | 52.13-1.5              | 30-1.5                                        |
| <i>R</i> <sub>merge</sub>                           | 0.055 (0.490)                       | 0.057 (0.403)          | 0.033 (0.436)                                 |
| <i>R</i> <sub>pim</sub>                             | 0.041 (0.363)                       | 0.027(0.232)           | 0.015(0.208)                                  |
| CC(1/2)                                             | 0.998 (0.774)                       | 0.998 (0.839)          | 1.0 (0.926)                                   |
| <I/σI>                                              | 11.1 (2.0)                          | 13.3 (2.7)             | 32.2 (3.6)                                    |
| Completeness (%)                                    | 99.9 (89.5)                         | 99.8 (100)             | 97.3 (78.5)                                   |
| Redundancy                                          | 3.3 (3.0)                           | 4.9 (4.0)              | 7.2 (6.1)                                     |
| Total reflections                                   | 1180604 (7976)                      | 113049 (13277)         | 280441 (9360)                                 |
| Unique reflections                                  | 36177 (2646)                        | 23188 (3349)           | 39140 (1529)                                  |
| <b>Refinement</b>                                   |                                     |                        |                                               |
| Resolution (Å)                                      | 2.0                                 | 1.5                    | 1.5                                           |
| <i>R</i> <sub>work</sub> / <i>R</i> <sub>free</sub> | 18.5/22.5                           | 17.1/20.5              | 17.3/19.9                                     |
| Number of atoms                                     |                                     |                        |                                               |
| Protein                                             | 3476                                | 879                    | 1677                                          |
| Ligand                                              | 5 (Ni); 52 (FLC)                    | 7 (MLA); 1 (Ni)        | 2 (Ni)                                        |
| Water                                               | 281                                 | 196                    | 260                                           |
| B-factors                                           |                                     |                        |                                               |
| Protein                                             | 30.9                                | 16.9                   | 20.8                                          |
| Water                                               | 38.6                                | 33.4                   | 36.0                                          |
| Ligand                                              | 27.5 (Ni); 51.3 (FLC)               | 15.8 (MLA); 11.9 (Ni)  | 19.8 (Ni)                                     |
| r.m.s.d.                                            |                                     |                        |                                               |
| Bond lengths (Å)                                    | 0.011                               | 0.009                  | 0.0015                                        |
| Bond angles (°)                                     | 1.997                               | 1.417                  | 1.827                                         |
| Ramachandran (%)                                    |                                     |                        |                                               |
| Preferred                                           | 97.0                                | 98.2                   | 98.2                                          |
| Allowed                                             | 3.0                                 | 1.8                    | 1.3                                           |
| Disallowed                                          | 0                                   | 0                      | 0.5 (1 residue)                               |

**Table S5. Oligonucleotide primers used in this study**

| <b>Primer name</b>         | <b>Primer sequence (5'→3')</b>                     |
|----------------------------|----------------------------------------------------|
| <i>HaKdgF</i> fwd          | CATAT <b>CGCTAGCA</b> ACACAGGCAGTTTCTTC            |
| <i>HaKdgF</i> rev          | GGTGGT <b>CTCGAG</b> TTATGATTTTCAGCATGTCATCGCG     |
| <i>YeKdgF</i> fwd          | CATAT <b>CGCTAGCA</b> AAGATGTTCTTTATTAATGATGAAACG  |
| <i>YeKdgF</i> rev          | GTGGT <b>CTCGAG</b> TTACAAGAAATCATCCCGTTTG         |
| <i>EcKdgF</i> fwd          | <u>CGCGGCAGCCATATGTTTGTATTTAATGAAGATACAGC</u>      |
| <i>EcKdgF</i> rev          | <u>GGTGGTGGTGCTCGATTACTTTAAAAAATCCTGACGT</u>       |
| <i>YeKdul</i> fwd          | <u>CGCGGCAGCCATATGCAAATTTGTCAAAGCATTTCATAGC</u>    |
| <i>YeKdul</i> rev          | <u>GGTGGTGGTGCTCGATTAGCGCAGTTCGCTAACGG</u>         |
| <i>YeKduD</i> fwd          | <u>CGCGGCAGCCATATGATCTTAGATTCCTTTGAGTTAA</u>       |
| <i>YeKduD</i> rev          | <u>GGTGGTGGTGCTCGATTAGCGAGCCAACCAGC</u>            |
| <i>kdgF</i> upstream fwd   | <u>GTACCCGGGGATCGCGGAGTTTTTATGGATTTTCATCAAG</u>    |
| <i>kdgF</i> upstream rev   | ATTAATACTGGGTATCACCACCTCTCTGAAAATATTTAAAGTAG       |
| <i>kdgF</i> downstream fwd | <u>ATACCCAGTATTAATATGAACTAAAATGGTAGCGCATAAAATG</u> |
| <i>kdgF</i> downstream rev | <u>CGACTCTAGAGGATCCTTTACCAAACATAGCTTTAGAAC</u>     |
| <i>kdgF</i> flank fwd      | TCTCTATGTTGGTGATGGTTCAGGTAGTCC                     |
| <i>kdgF</i> flank rev      | TCAGAAACAAATGTTCTCGGTTGTTCAAGG                     |
| pGEX- <i>kdgF</i> fwd      | <u>CAGGAAACAGTATTCATGTTTGTATTTAATGAAGATACAGC</u>   |
| pGEX- <i>kdgF</i> rev      | <u>AGATCGTCAGTCAGTTTACTTTAAAAAATCCTGACGTTGAGG</u>  |

Utilized restriction sites are shown in bold. Underlining indicates vector-derived sequences used for In-Fusion® cloning. Italics indicate complementary sequence that was used to join the upstream and downstream flanks together.

## Supporting Information Figures

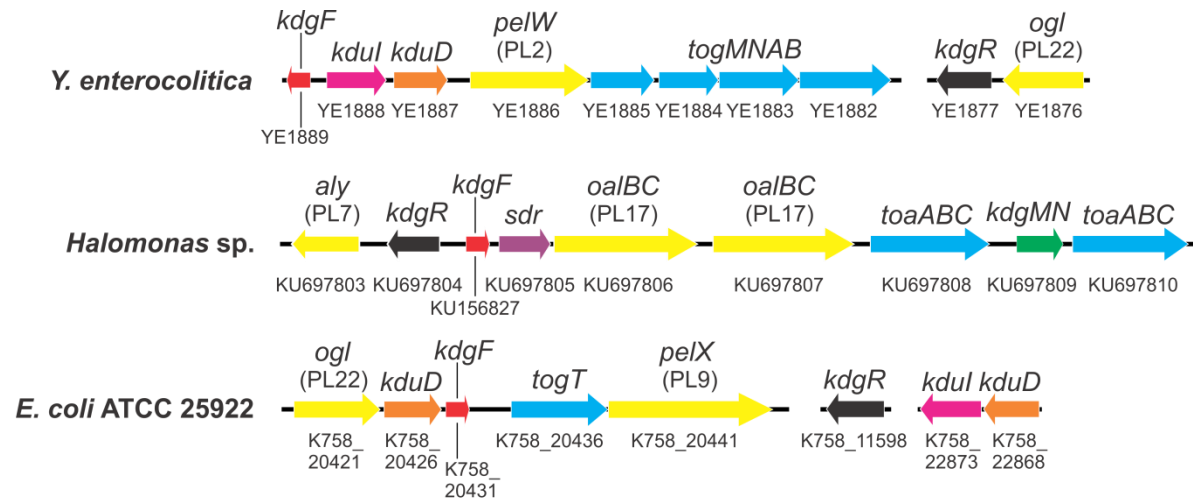

**Fig. S1. Polyuronate utilization loci from the pectinolytic bacterium *Y. enterocolitica*, the alginolytic bacterium *Halomonas* sp. and *E. coli* ATCC 25922.**

ORFs are color coded according to their predicted function: DK1 isomerase (pink), DKII reductase (orange), uronate lyase (yellow), uronate transporter (blue), transcriptional regulator (black), DEH reductase (purple), outer membrane porin (green). Gene name annotations for *Y. enterocolitica* and *E. coli* are taken from Rodionov et al. (23); gene names for *Halomonas* sp., with the exception of *aly*, were assigned according to homology with genes identified in *Vibrio splendidus* (24). PL numbers refer to the family of polysaccharide lyases according to the CAZy database ([www.cazy.org](http://www.cazy.org)). ORFs are to scale within each organism, with locus tags given underneath.

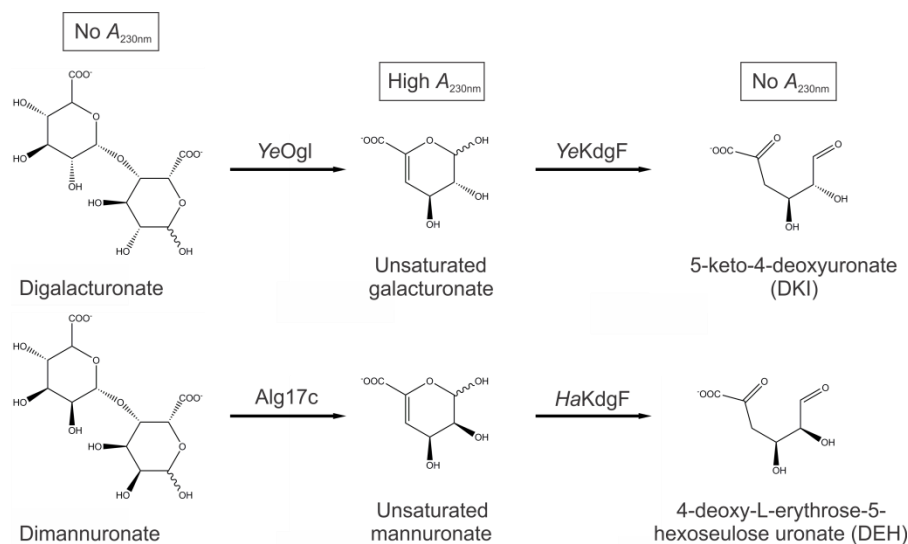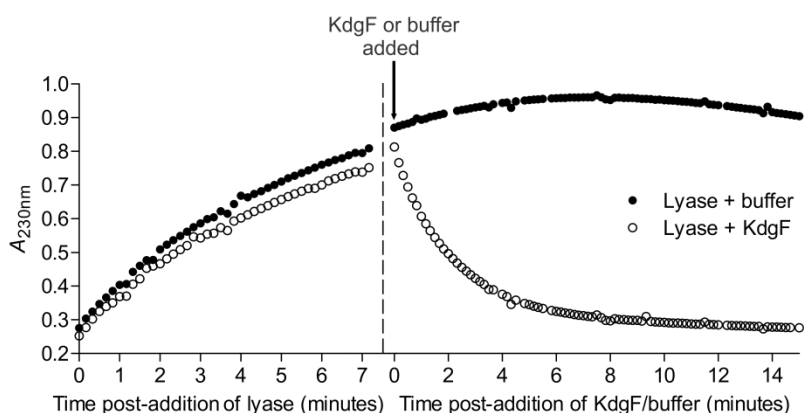

**Fig. S2. Coupled assay used for detection of double bond depletion.**

Cleavage of a diuronate by a polysaccharide lyase produces a 4,5-unsaturated monouronate, resulting in an increase in absorbance at 230 nm. Subsequent depletion of this double bond – either through spontaneous conversion or the action of KdgF – results in a decrease in absorbance. The data shown are illustrative, and show the effect of the addition of YeOgl to digalacturonate in two different wells of a microtiter plate (filled circles and open circles), followed by the addition of a buffer blank to one well and 100 nM YeKdgF to the other. The dashed line represents the approx. 10 second gap in data collection while YeKdgF/buffer was added. The significant rate of spontaneous conversion of the unsaturated monouronate means that it cannot be isolated and purified for use as a substrate, and KdgF activity can only be monitored in a coupled assay with a lyase.

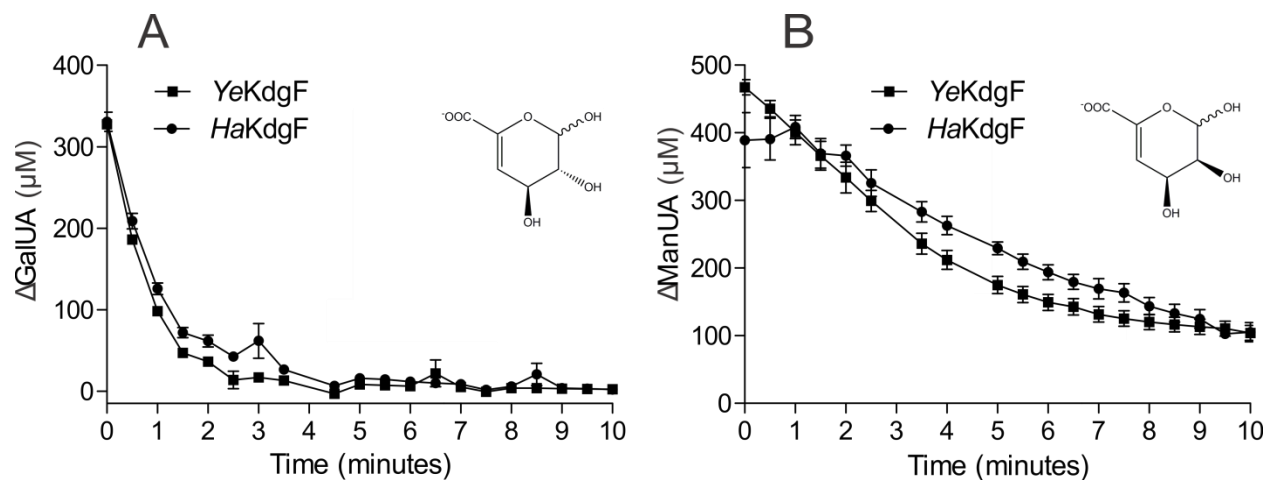

**Fig. S3. Substrate specificity of YeKdgF and HaKdgF on unsaturated monouronates.** Double bond depletion in unsaturated monouronate in the presence of 1  $\mu\text{M}$  YeKdgF or HaKdgF was followed at 230 nm. (A) Activity of YeKdgF and HaKdgF on unsaturated galacturonate. (B) Activity of YeKdgF and HaKdgF on unsaturated mannuronate. Error bars, where visible, represent the SEM (n=3).

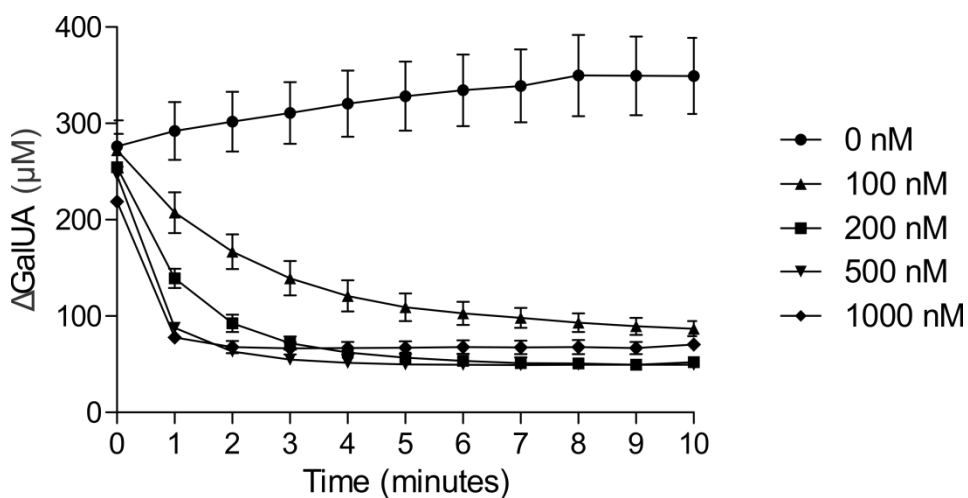

**Fig. S4. Concentration-dependent activity of EcKdgF on unsaturated galacturonate.** Double bond depletion in unsaturated galacturonate in the presence of increasing concentrations of EcKdgF was followed at 230 nm. Error bars, where visible, represent the SEM (n=3).

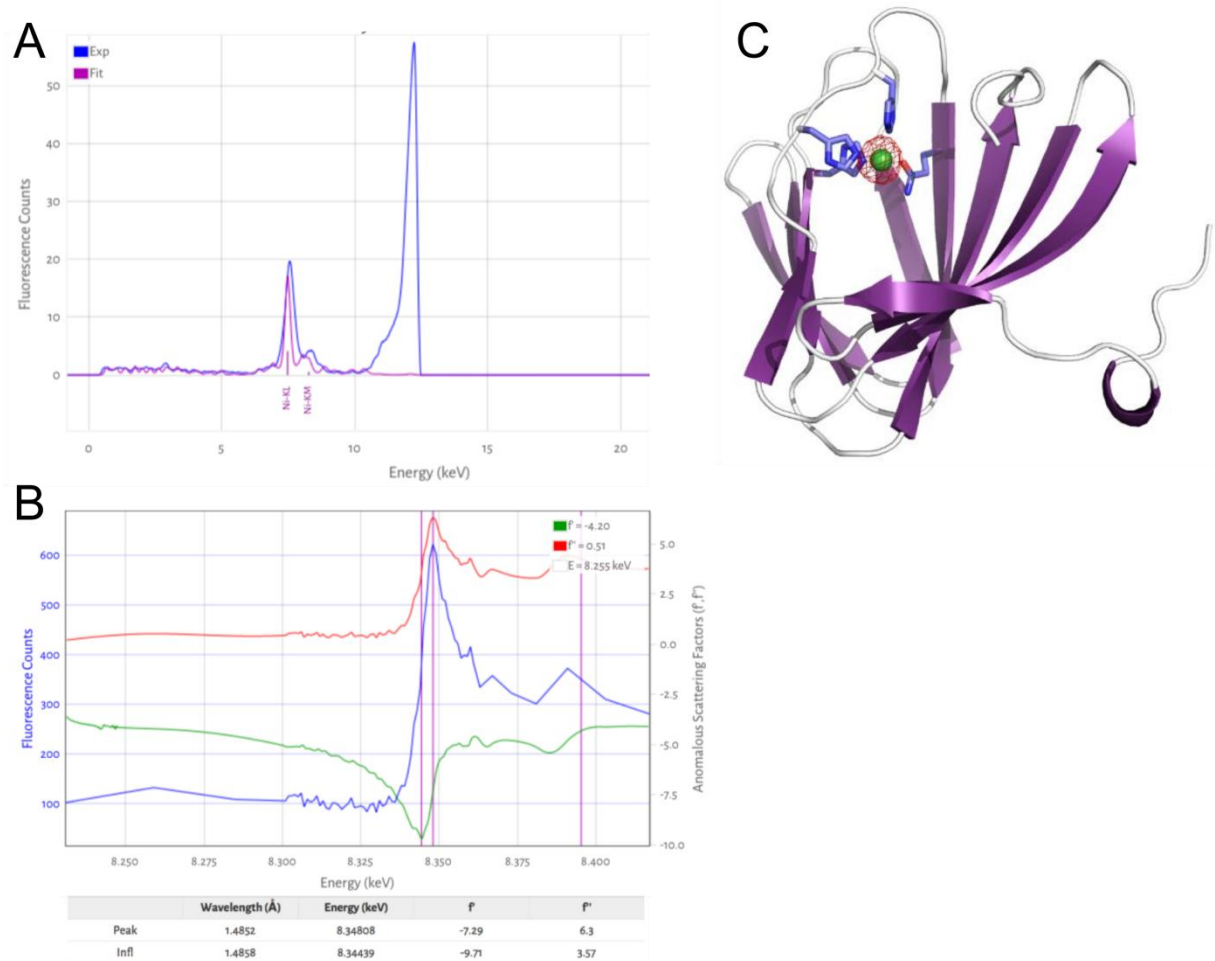

**Fig. S5. Identification of the metal bound to YeKdgF.** (A) X-ray fluorescence excitation of YeKdgF crystals (blue line) overlapped with the theoretical KL and KM edges of Ni (pink line). (B) MAD scan of YeKdgF crystals at the nickel edge. (C) The structure of YeKdgF showing the anomalous difference map contoured at  $5\sigma$  generated from data collected at the nickel-peak and surrounding the entire monomer. Anomalous difference signal was only detected as overlapping with the modeled metal ion (green sphere).

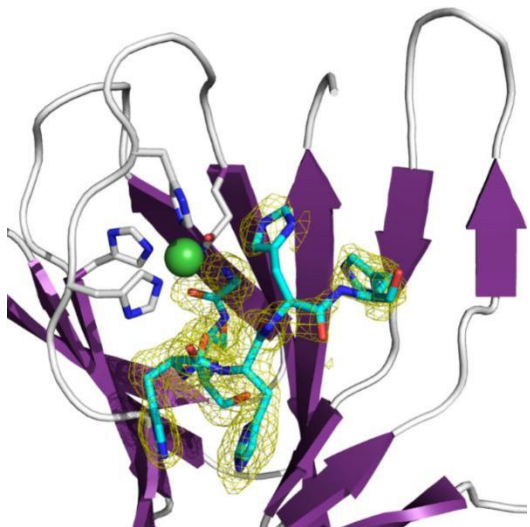

**Fig. S6. Structure of *YeKdgF* in spacegroup  $P2_12_12_1$  showing N-terminal 6-histidine tag bound to the metal site.** The bound peptide is shown as light blue sticks and its  $F_o-F_c$  electron density maps (contoured at 3s) is shown as yellow mesh. Residues coordinating the bound metal atom are shown as grey sticks. A bound metal that was modeled as a  $Ni^{2+}$  atom is shown as a green sphere.

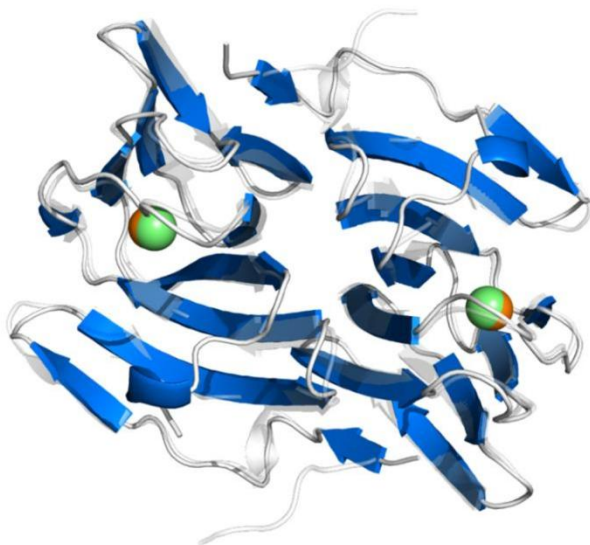

**Fig. S7. Structure of *HaKdgF*.** Structure of *HaKdgF* (blue with green spheres for bound metal atom) determined at 2.35 Å resolution superimposed with the structure of *YeKdgF* (transparent grey).



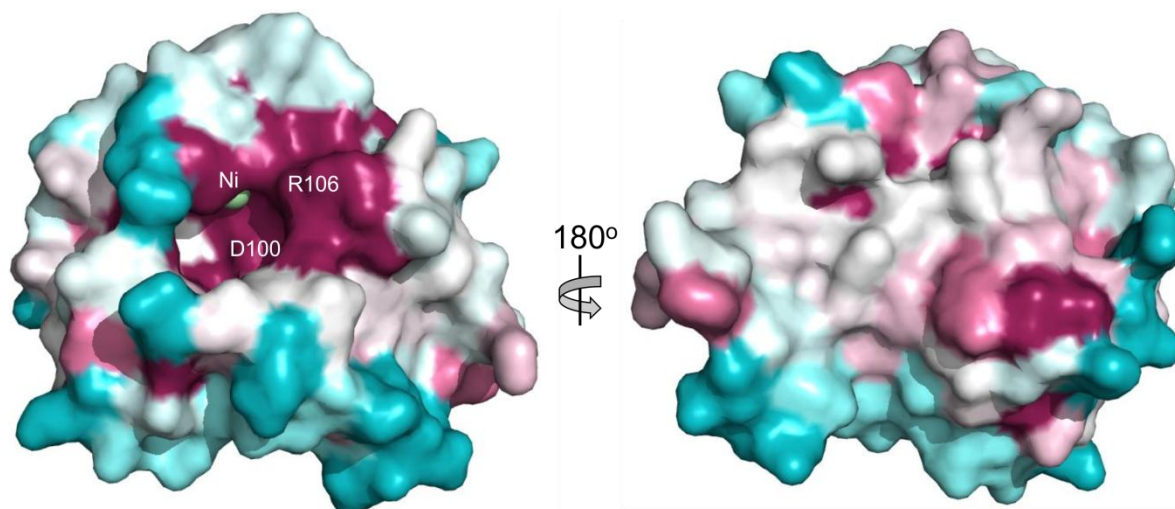

**Fig. S8.** The conservation of surface exposed residues generated by Consurf analysis and mapped onto the surface of YeKdgF. 400 unique KdgF amino acid sequences were used in the analysis. The positions of the nickel atom (green sphere) and the proposed catalytic residues D100 and R106 are shown for reference. Residue conservation is colored with a gradient from turquoise (variable) through white to dark pink (conserved).

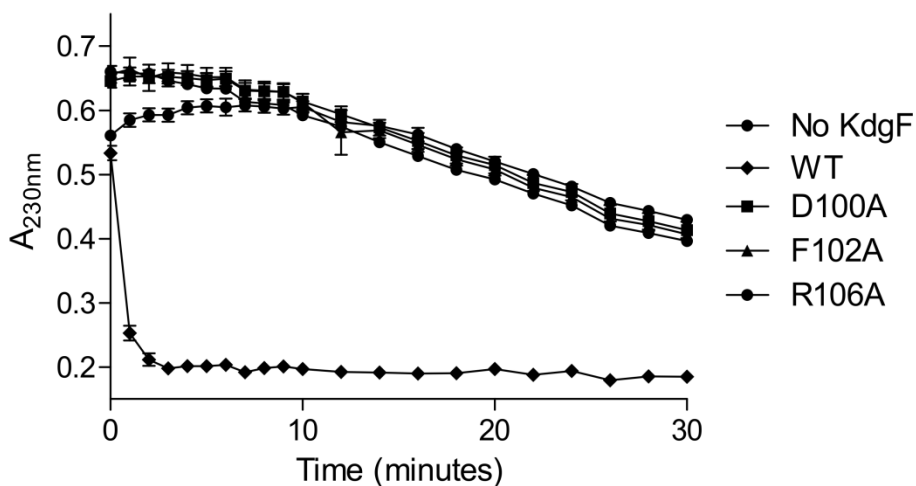

**Fig. S9.** Inactivity of YeKdgF mutants D100A, F102A and R106A. The double bond depletion activity of YeKdgF mutants at 250 nM on unsaturated galacturonate was followed at  $A_{230nm}$  for 30 minutes. Error bars, where visible, represent the SEM (n=4).

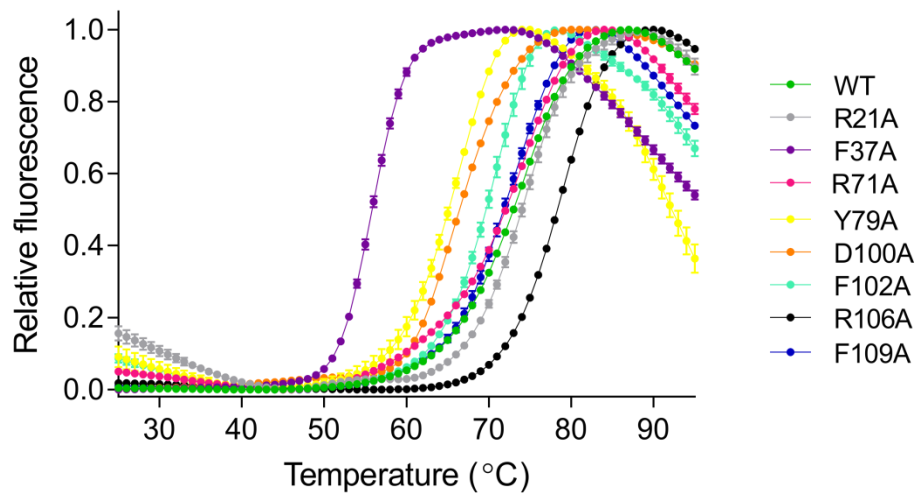

**Fig. S10. Thermal unfolding of YeKdgF mutants.** The thermal unfolding of wildtype YeKdgF and its mutants was compared using differential scanning fluorimetry. Data are shown relative to the highest fluorescence value for each protein. Error bars, where visible, represent the SEM (n=4).

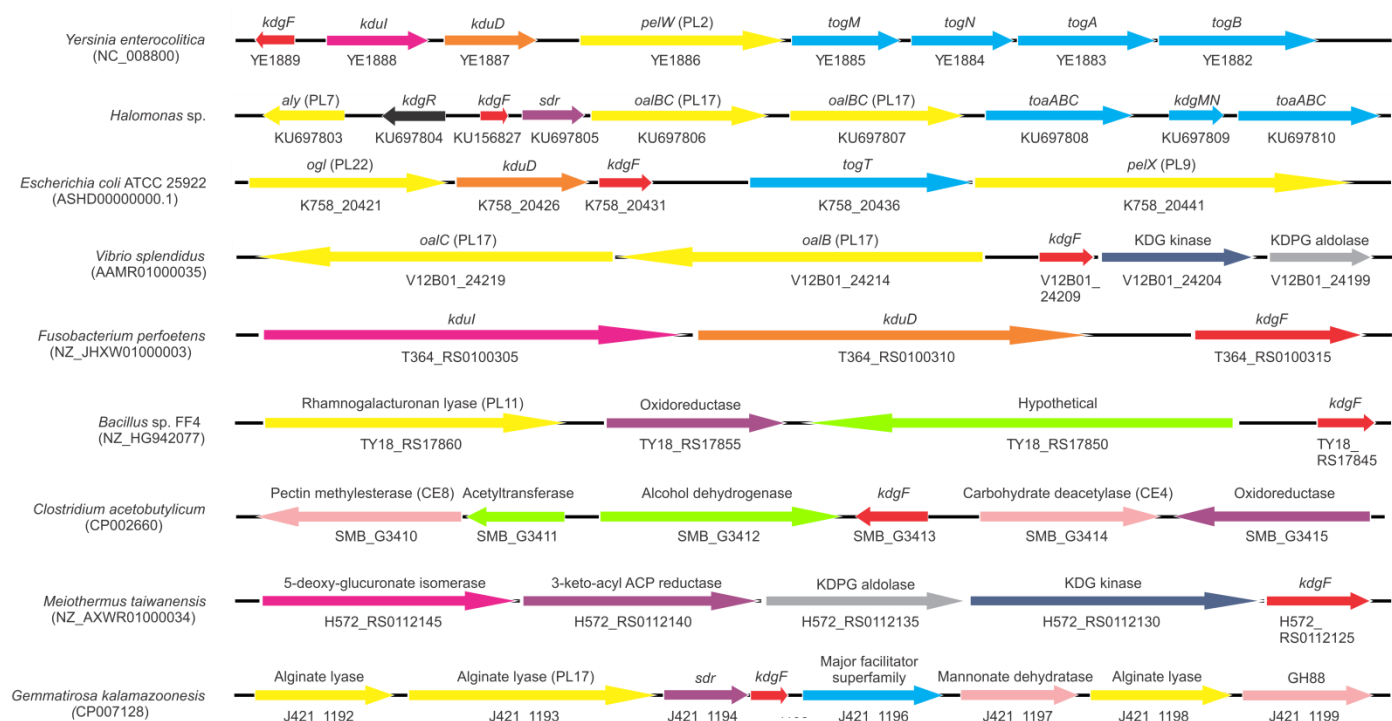

**Fig. S11. Genomic context of *kdgF* in diverse bacteria.** The genomic context of *kdgF* in bacteria from diverse phyla is shown, specifically when it is associated with other genes involved in carbohydrate metabolism and modification. ORFs are color coded according to their predicted function: KdgF (red), uronate isomerase (fuchsia), sugar dehydrogenase (orange), uronate lyase (yellow), sugar transporter (light blue), transcriptional regulator (black), reductase (purple), KDG kinase (dark blue), KDPG aldolase (grey), other carbohydrate-active enzymes (light pink), hypothetical and other proteins (green). Gene name annotations for *Y. enterocolitica* and *E. coli* are taken from Rodionov et al. (23); gene names for *Halomonas* sp., with the exceptions of *aly* and *sdr*, were assigned according to homology with genes identified in *Vibrio splendidus* by Wargacki et al. (24). PL, GH, CE and GT numbers refer to families of polysaccharide lyases, glycoside hydrolases, carbohydrate esterases and glycosyl transferases, respectively, according to the CAZy database (25); GH88 are a family of unsaturated glucuronyl hydrolases. ORFs are to scale within each organism, with locus tags given underneath.
